# Supplementary material for: Evidence gap on antihyperglycemic pharmacotherapy in frail older adults
Source: Springer Nature journal article supplement (doi:10.1007/s00391-020-01724-3), 2020-04-17
Supplement: MOESM1 [file 19022504]

## Search strategy RCTs

Search date: 10/19/2018

Ovid MEDLINE(R) 1946 to October Week 2 2018

Ovid MEDLINE(R) Daily Update October 18, 2018

Ovid MEDLINE(R) In-Process & Other Non-Indexed Citations October 18, 2018

Ovid MEDLINE(R) Epub Ahead of Print October 18, 2018

1. exp Diabetes Mellitus/
2. (Type\* adj3 ("2" or "II" or two\*) adj3 (diabete\* or diabetic\*)).ti,ab,kf.
3. ((Maturit\* or adult\* or slow\*) adj3 onset\* adj3 (diabete\* or diabetic\*)).ti,ab,kf.
4. ((Ketosis-resistant\* or stable\*) adj3 (diabete\* or diabetic\*)).ti,ab,kf.
5. ((Non-insulin\* or Noninsulin\*) adj3 depend\* adj3 (diabete\* or diabetic\*)).ti,ab,kf.
6. NIDDM.ti,ab,kf.
7. 1 or 2 or 3 or 4 or 5 or 6
8. drug therapy/ or exp drug administration routes/ or exp drug administration schedule/ or exp drug delivery systems/ or drug dosage calculations/ or exp drug prescriptions/ or exp drug therapy, combination/ or drug therapy, computer-assisted/ or inappropriate prescribing/ or exp medication errors/ or exp polypharmacy/ or self administration/ or self medication/
9. drug therap\*.ti,ab,kf.
10. drug therapy.fs.
11. (pharmacotherap\* or pharmaco-therap\*).ti,ab,kf.
12. drugs.ti,ab,kf.
13. medication.ti,ab,kf.
14. or/8-13
15. Dipeptidyl-Peptidase IV Inhibitors/
16. (Dipeptidyl\* adj2 Peptidase\* adj2 ("4" or "iv") adj Inhibitor\*).ti,ab,kf,nm.
17. (Dipeptidylpeptidase\* adj2 ("4" or "iv") adj Inhibitor\*).ti,ab,kf,nm.
18. (DPP\* adj2 ("4" or "iv")).ti,ab,kf,nm.
19. Gliptin\*.ti,ab,kf,nm.
20. (Sitagliptin\* or Januvia\*).ti,ab,kf,nm.
21. (Vildagliptin\* or Galvus\*).ti,ab,kf,nm.
22. (Linagliptin\* or Trajenta\*).ti,ab,kf,nm.
23. (Saxagliptin\* or Onglyza\*).ti,ab,kf,nm.
24. (Alogliptin\* or Nesina\*).ti,ab,kf,nm.
25. or/15-24
26. exp Glucagon-Like Peptide 1/
27. (Glucagon\* adj Like adj Peptide adj "1").ti,ab,kf,nm.
28. (GLP\* adj "1").ti,ab,kf,nm.
29. (Exenatid\* or Byetta\* or Bydureon\*).ti,ab,kf,nm.
30. (Liraglutid\* or Victoza\* or Dulaglutid\* or Trulicity\* or Albiglutid\* or Tanzeum\*).ti,ab,kf,nm.

31. (Lixisenatid\* or Lyxumia\* or Adlyxin\*).ti,ab,kf,nm.
32. or/26-31
33. Thiazolidinediones/
34. (Thiazolidinedion\* or Glitazon\*).ti,ab,kf,nm.
35. (Pioglitazon\* or Actos\*).ti,ab,kf,nm.
36. or/33-35
37. exp Sulfonylurea Compounds/
38. (Sulfonylurea\* or Sulphonylurea\*).ti,ab,kf,nm.
39. (Gl#benclamid\* or Glyburid\*).ti,ab,kf,nm.
40. (Glimepirid\* or Amaryl\*).ti,ab,kf,nm.
41. (Gl#clazid\* or Diamicron\*).ti,ab,kf,nm.
42. (Gliquidon\* or Glurenor\*).ti,ab,kf,nm.
43. or/37-42
44. exp Metformin/
45. (Metformin\* or Glucophage\*).ti,ab,kf,nm.
46. (Competact\* or Janumet\* or Eucreas\*).ti,ab,kf,nm.
47. Biguanides/
48. Biguanid\*.ti,ab,kf,nm.
49. or/44-48
50. exp Trisaccharides/
51. (Acarbos\* or Glucobay\*).ti,ab,kf,nm.
52. (Miglitol\* or Diastabol\* or Glyset\*).ti,ab,kf,nm.
53. or/50-52
54. exp Insulins/tu [Therapeutic Use]
55. exp Insulin/ad [Administration & Dosage]
56. Insulin Infusion Systems/
57. (Insulin\* adj3 (treat\* or therap\* or administrat\* or dos\* or human\* or analogue\* or biphasic\* or basal\* or protamin\* or isophan\* or inject\* or pen\* or deliver\* or device\* or system\* or pump\* or syringe\* or needle\*)).ti,ab,kf,nm.
58. (Insulin\* adj3 (Intermediate\* or shortact\* or short-act\* or longact\* or long-act\* or ultralong\* or ultra-long\*)).ti,ab,kf,nm.
59. (Actrapid\* or Humulin\* or Insuman\* or Hypurin\*).ti,ab,kf,nm.
60. (Aspart\* or Novorapid\*).ti,ab,kf,nm.
61. (Glulisin\* or Apidra\*).ti,ab,kf,nm.
62. (Lispro\* or Humalog\*).ti,ab,kf,nm.
63. (Insulin\* adj3 zinc\* adj3 (suspension\* or protamin\*)).ti,ab,kf,nm.
64. (Detemir\* or Levemir\*).ti,ab,kf,nm.
65. (Glargin\* or Lantus\*).ti,ab,kf,nm.
66. (Degludec\* or Tresiba\*).ti,ab,kf,nm.
67. (Isophan\* or Insulatard\* or Humulin\* or Insuman\* or Novomix\*).ti,ab,kf,nm.
68. or/54-67
69. Sodium-Glucose Transporter 2/
70. (Sodium\* adj3 Glucose\* adj3 Transporter\* adj3 "2").ti,ab,kf,nm.

71. (Sodium\* adj3 Glucose\* adj3 (co-transporter\* or cotransporter\*) adj3 "2").ti,ab,kf,nm.
72. SGLT\*.ti,ab,kf,nm.
73. Gliflozin\*.ti,ab,kf,nm.
74. (Canagliflozin\* or Dapagliflozin\* or Empagliflozin\*).ti,ab,kf,nm.
75. Glinid\*.ti,ab,kf,nm.
76. (Meglitinid\* or Nateglinid\* or Repaglinid\*).ti,ab,kf,nm.
77. or/69-76
78. exp hypoglycemic agents/
79. (hypoglyc\* or antihyperglyc\* or anti-hyperglyc\* or antidiabetic\* or anti-diabetic\*).ti,ab,kf,nm.
80. 25 or 32 or 36 or 43 or 49 or 53 or 68 or 77 or 78 or 79
81. elder\*.ti,ab,kf.
82. (community adj1 dwelling).ti,ab,kf.
83. geriatric.ti,ab,kf.
84. "mini-mental state".ti,ab,kf.
85. alzheimer\*.ti,ab,kf.
86. mmse.ti,ab,kf.
87. caregiver\*.ti,ab,kf.
88. falls.ti,ab,kf.
89. adl.ti,ab,kf.
90. Gds.ti,ab,kf.
91. Ag?ing.ti,ab,kf.
92. frail\*.ti,ab,kf.
93. Mci.ti,ab,kf.
94. exp dementia/
95. dement\*.ti,ab,kf.
96. (psychogeriatric\* or psycho-geriatric\*).ti,ab,kf.
97. "cognitive impairment".ti,ab,kf.
98. "postmenopausal women".ti,ab,kf.
99. comorbid\*.ti,ab,kf.
100. Geriatric Assessment/
101. exp Nursing homes/
102. Frail Elderly/
103. exp Cognition Disorders/di [Diagnosis]
104. exp Cognition disorders/ep [epidemiology]
105. Homes for the Aged/
106. disability.ti,ab,kf.
107. disabled persons/ or persons with hearing impairments/ or visually impaired persons/
108. "functional decline".ti,ab,kf.
109. (gerontopsychiatry or geronto-psychiatry).ti,ab,kf.
110. "activities of daily living".ti,ab,kf.

111. exp "Activities of daily living"/
112. immobility.ti,ab,kf.
113. immobilization.ti,ab,kf.
114. or/81-113
115. randomized controlled trial.pt.
116. controlled clinical trial.pt.
117. randomi#ed.ab.
118. placebo.ab.
119. randomly.ab.
120. trial.ab.
121. groups.ab.
122. 115 or 116 or 117 or 118 or 119 or 120 or 121 or 10
123. exp animals/ not humans/
124. 122 not 123
125. 7 and 14
126. 80 or 125
127. 126 and 124 and 114
