# Supplementary material for: Evidence gap on antihyperglycemic pharmacotherapy in frail older adults
Source: Springer Nature journal article supplement (doi:10.1007/s00391-020-01724-3), 2020-04-17
Supplement: MOESM3 [file 19022504]

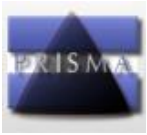

## PRISMA 2009 Flow Diagram

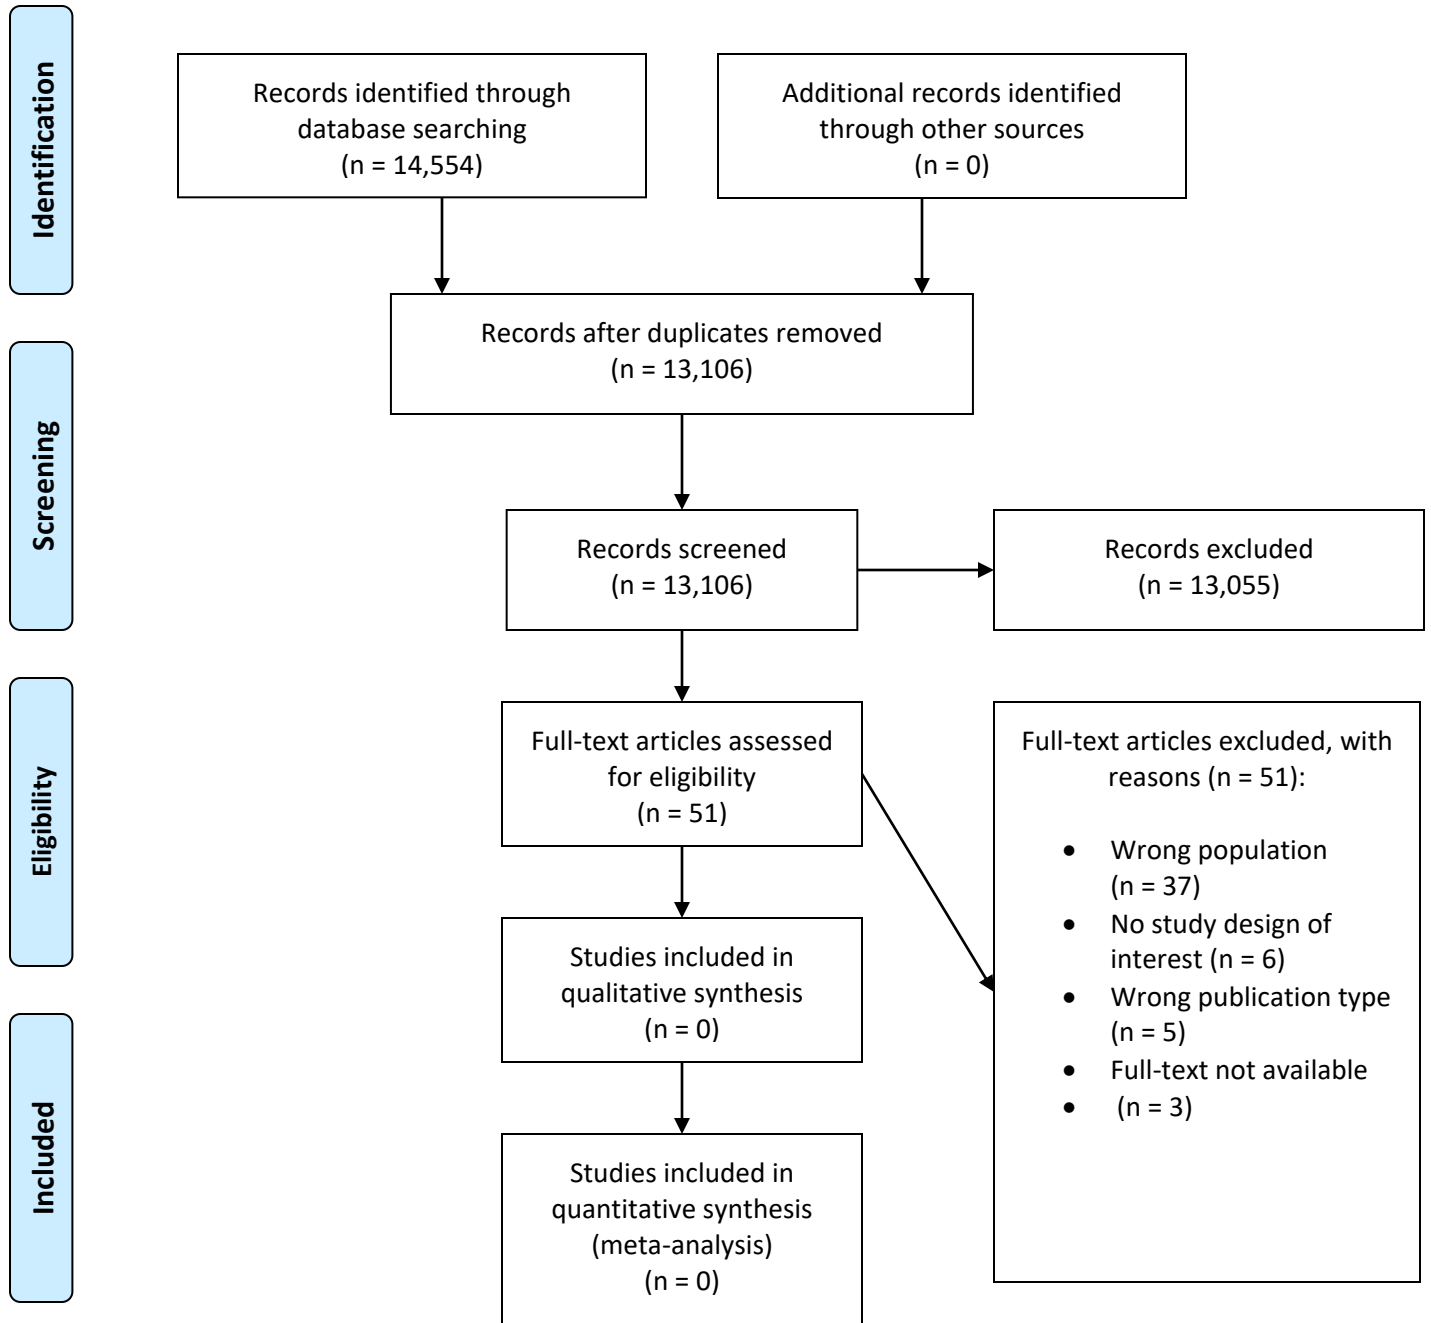

From: Moher D, Liberati A, Tetzlaff J, Altman DG, The PRISMA Group (2009). Preferred Reporting Items for Systematic Reviews and Meta-Analyses: The PRISMA Statement. PLoS Med 6(7): e1000097. doi:10.1371/journal.pmed1000097

For more information, visit [www.prisma-statement.org](http://www.prisma-statement.org).
